# Supplementary material for: Novel Microemulsions with Essential Oils for Environmentally Friendly Cleaning of Copper Cultural Heritage Artifacts
Source: MDPI journal article supplement (doi:10.3390/nano13172430), 2023-08-26
Supplement: s1 [file s1]

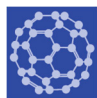

## Supplementary informations

## Results

|                                          | Size (d.nm):  | % Number: | St Dev (d.n... |
|------------------------------------------|---------------|-----------|----------------|
| Z-Average (d.nm): 67.54                  | Peak 1: 14.36 | 100.0     | 3.677          |
| Pdl: 0.459                               | Peak 2: 0.000 | 0.0       | 0.000          |
| Intercept: 0.954                         | Peak 3: 0.000 | 0.0       | 0.000          |
| Result quality : Refer to quality report |               |           |                |

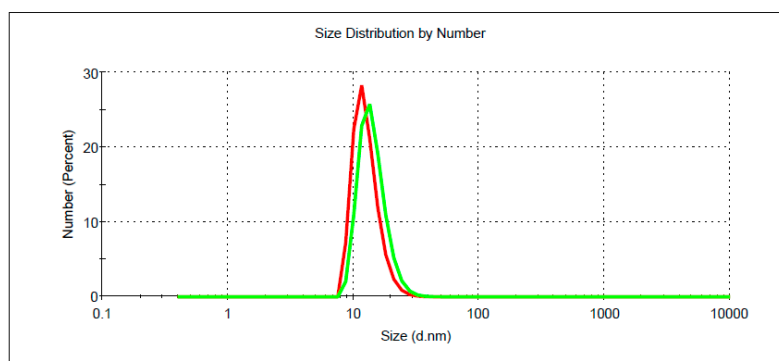

**Figure S1.** Size and size distribution in number for the xylene microemulsion (sample M – red line) and xylene microemulsion with encapsulated thyme essential oil (sample P3 – green line).

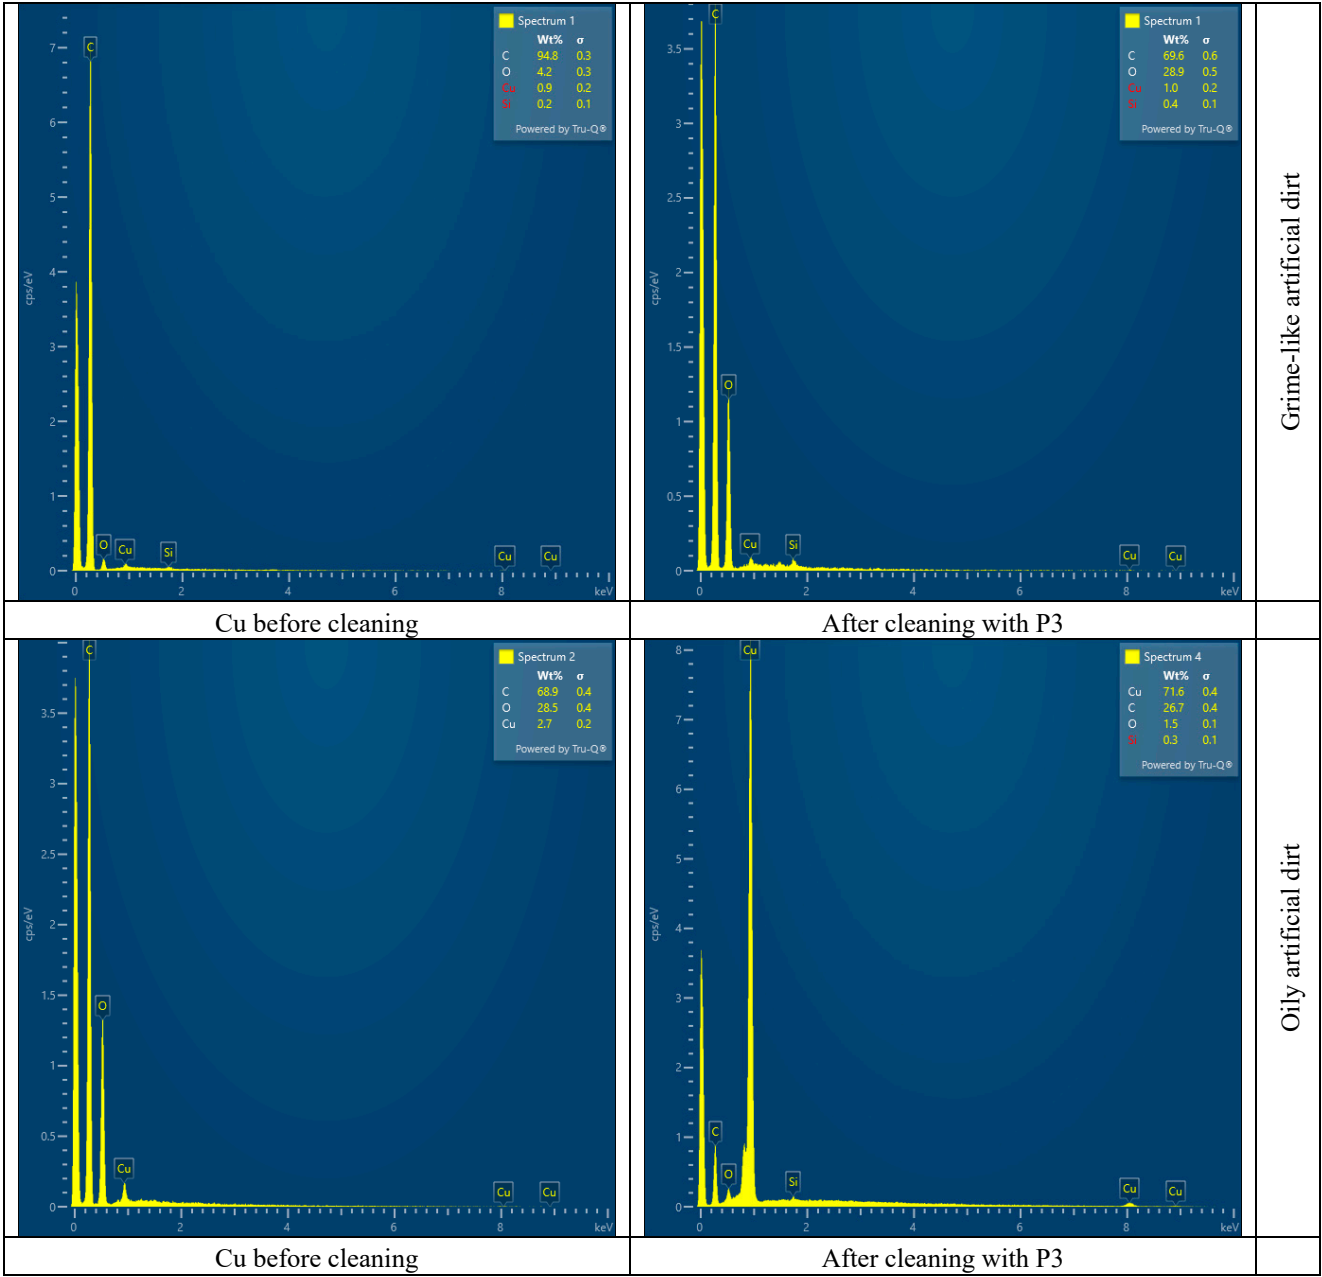

(a)

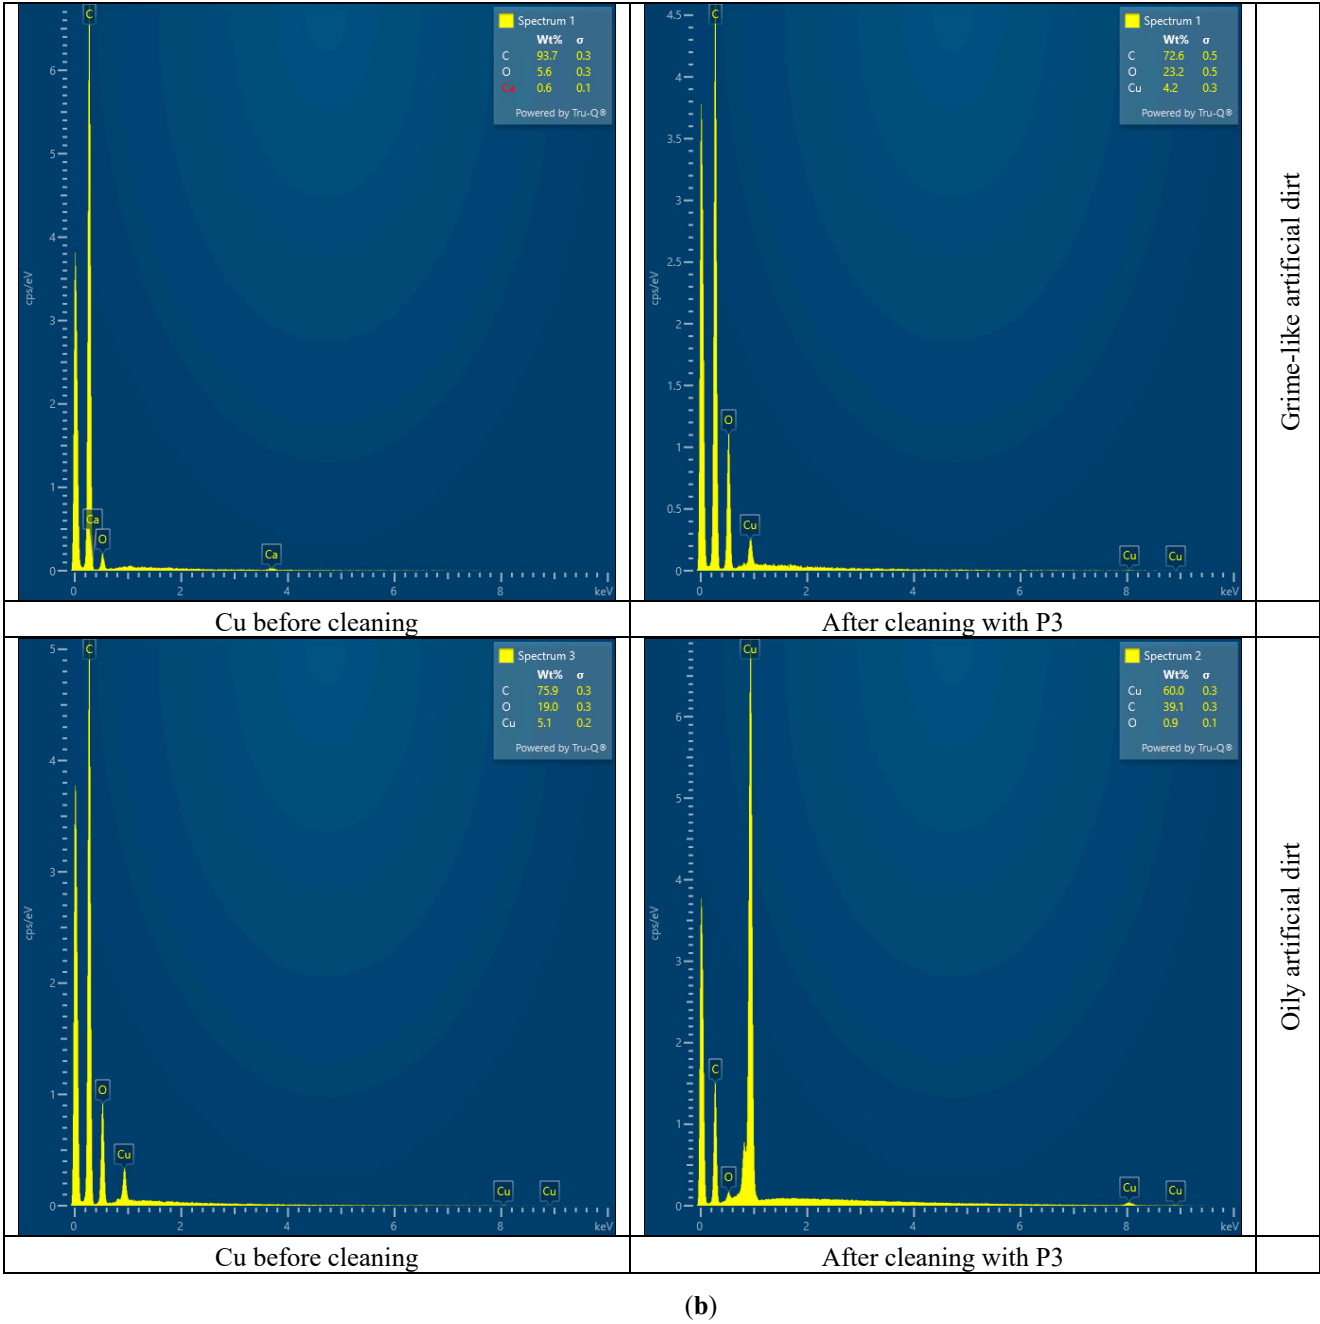

**Figure S2.** EDX images of Cu coupons covered with grime-like artificial dirt (upper register) and oily artificial dirt (bottom register), before and after cleaning with encapsulating Thyme EO micro-emulsions; (a) and after cleaning with encapsulating cinnamon EO microemulsions (b).

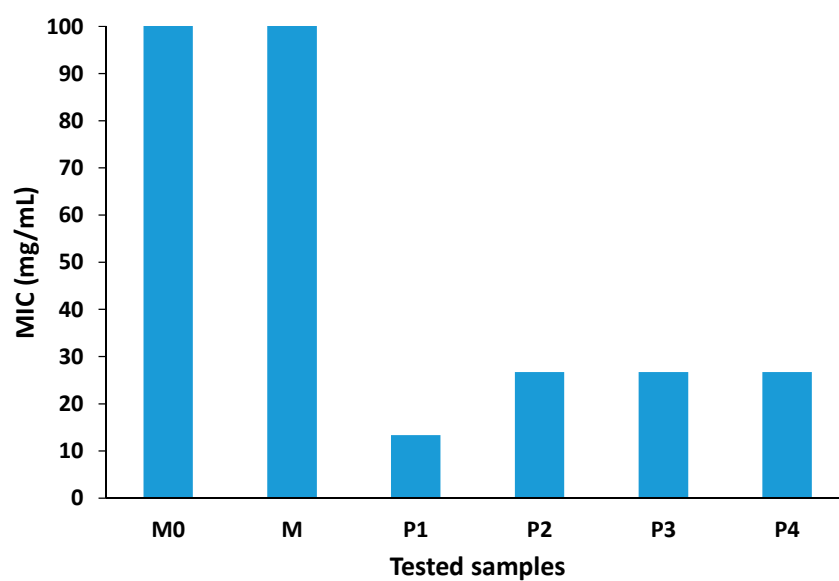

Figure S3. MIC values of various P84-TPGS nanosystems tested against *A. niger*.

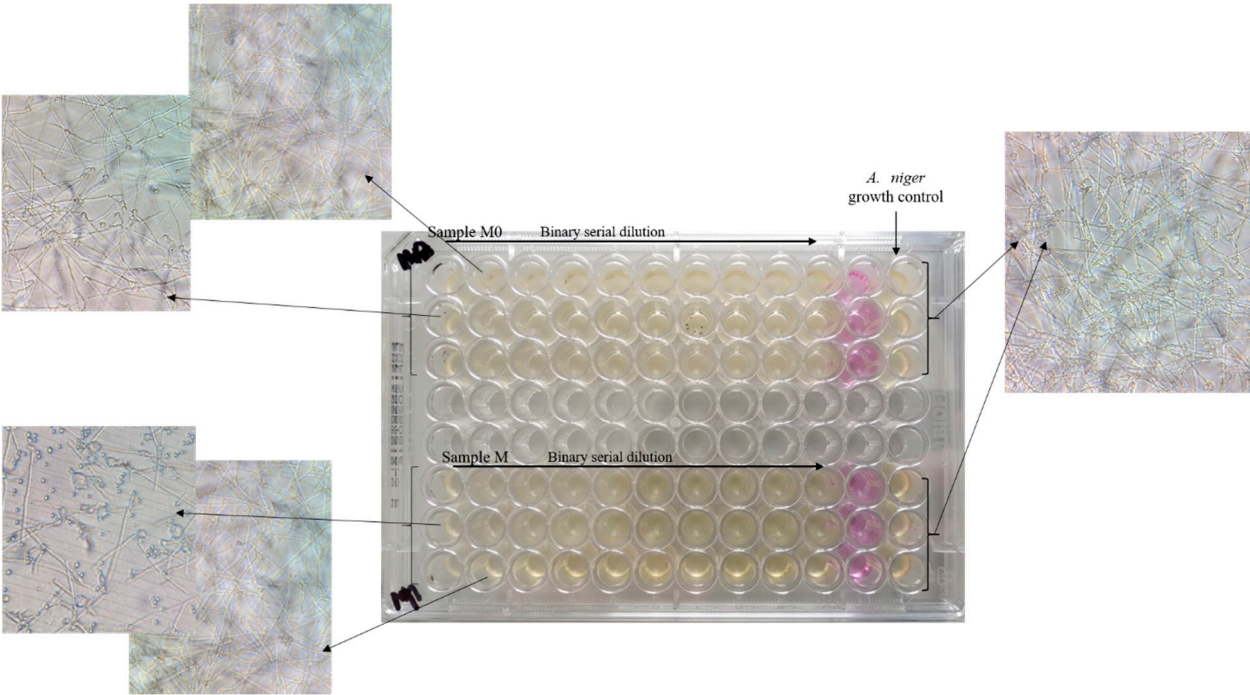

(a)

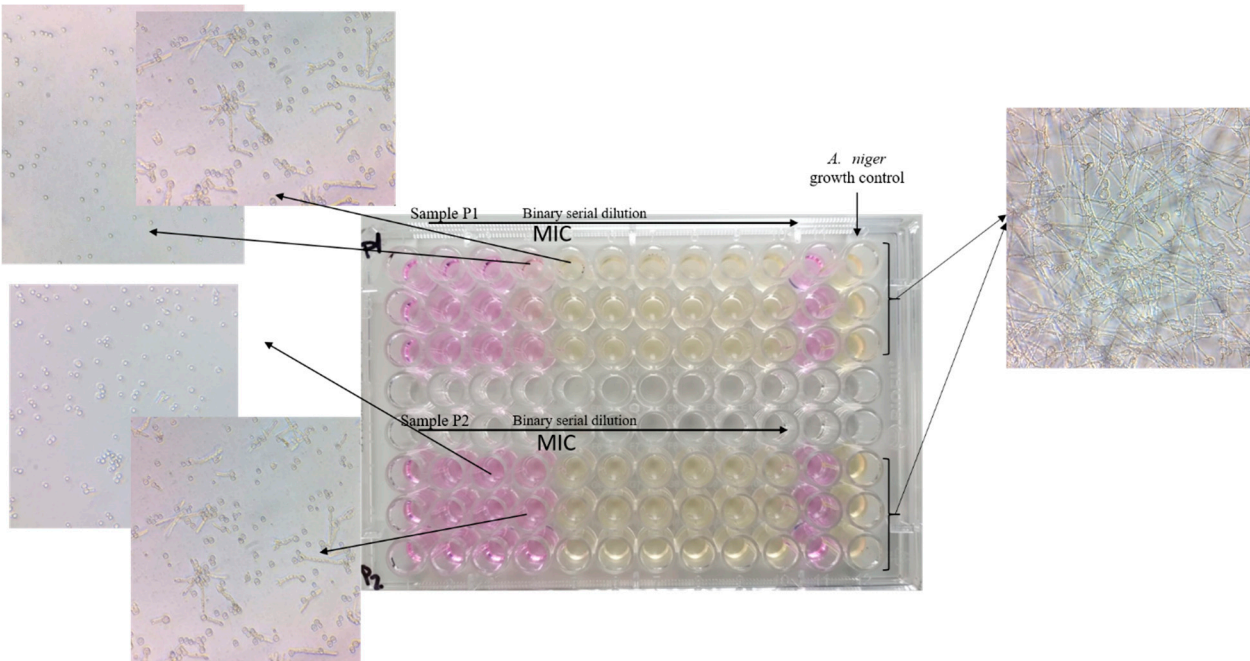

(b)

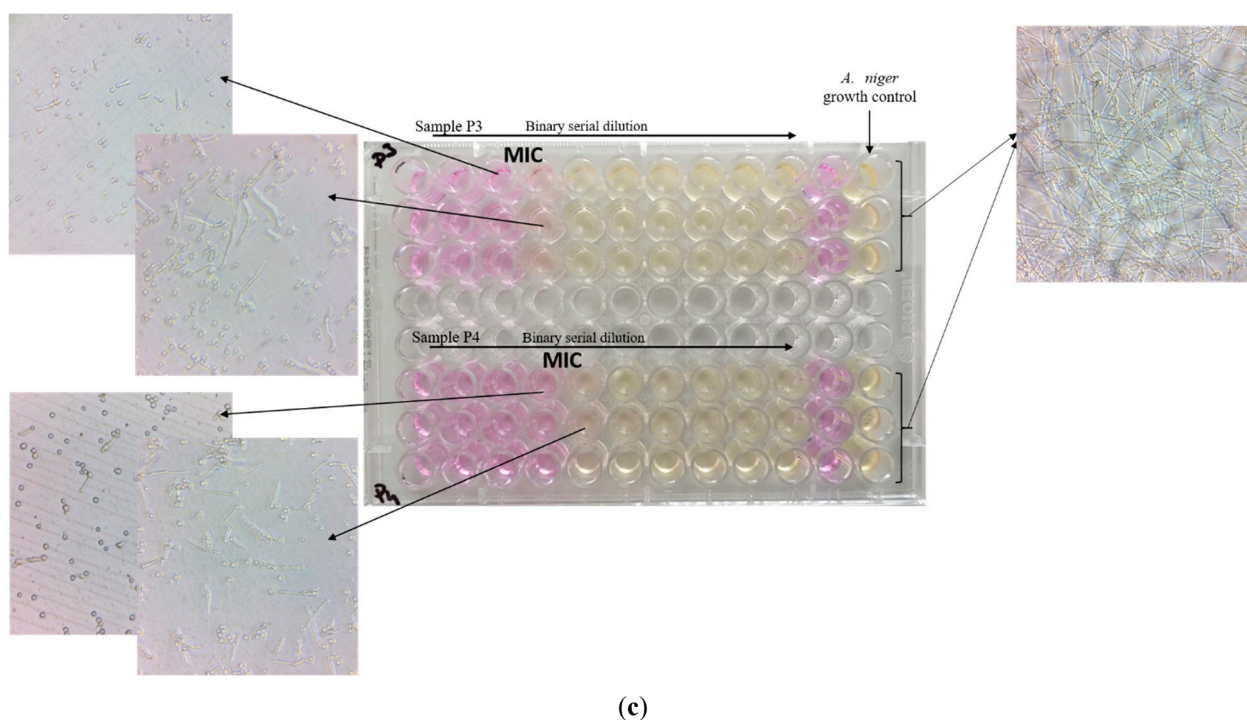

**Figure S4.** (a): Antifungal activity against *A. niger* of P84-TPGS micellar dispersion and of P84-TPGS microemulsion with xylene, (b): Antifungal activity against *A. niger* of P84-TPGS micellar dispersions with EOs (P1 with thyme, P2 with cinnamon), (c): Antifungal activity against *A. niger* of xylene P84-TPGS microemulsions with EOs (P3 with thyme, P4 with cinnamon).

**Table S1.** The chromatic coordinated  $L^*$ ,  $a^*$  and  $b^*$  variation determined for copper coupons treated with glime artificial dirt (MSA) and oily artificial dirt (MSC) after cleaning with various P84-TPGS nanosystems (micelles and microemulsions).

| Cleaning agent | Artificial dirt | $\Delta L^*$     | $\Delta a^*$     | $\Delta b^*$     |
|----------------|-----------------|------------------|------------------|------------------|
| M              | MSA             | $50.59 \pm 1.08$ | $16.06 \pm 0.77$ | $19.44 \pm 1.01$ |
| P1             | MSA             | $53.12 \pm 1.08$ | $16.69 \pm 0.8$  | $21.09 \pm 1.01$ |
| P2             | MSA             | $33.36 \pm 2.1$  | $11.49 \pm 1.15$ | $15.92 \pm 1.42$ |
| P3             | MSA             | $48.97 \pm 3.37$ | $15.38 \pm 1.59$ | $19.92 \pm 1.95$ |
| P4             | MSA             | $41.68 \pm 1.35$ | $13.50 \pm 0.44$ | $19.00 \pm 0.54$ |
| M              | MSC             | $0.31 \pm 0.13$  | $0.09 \pm 0.08$  | $1.22 \pm 0.21$  |
| P1             | MSC             | $-0.50 \pm 0.58$ | $0.35 \pm 0.10$  | $1.48 \pm 0.23$  |
| P2             | MSC             | $-2.02 \pm 1.09$ | $0.29 \pm 0.27$  | $4.60 \pm 1.03$  |
| P3             | MSC             | $-3.56 \pm 3.14$ | $0.51 \pm 0.24$  | $2.12 \pm 1.78$  |
| P4             | MSC             | $-1.70 \pm 1.38$ | $0.61 \pm 0.14$  | $3.96 \pm 0.68$  |

**Table S2.** Corrosion parameters determined for Cu coupons coated with different P84-TPGS nanosystems.

| Sample | Composition of coating on Cu coupons | $R_{ct} (\Omega)$  | $-E_{corr} (V)$ | $I_{corr} (\mu A/cm^2)$ |
|--------|--------------------------------------|--------------------|-----------------|-------------------------|
| M      | $\mu E$ with xylene                  | $107.40 \pm 72.72$ | $0.38 \pm 0.12$ | $2.99 \pm 1.79$         |
| P1     | P84-TPGS micelles with thyme EO      | $90.35 \pm 28.07$  | $0.31 \pm 0.05$ | $1.08 \pm 0.33$         |
| P2     | P84-TPGS micelles with cinnamon EO   | $98.14 \pm 41.94$  | $0.35 \pm 0.12$ | $1.04 \pm 0.66$         |
| P3     | $\mu E$ with xylene and thyme EO     | $161.5 \pm 36.91$  | $0.36 \pm 0.13$ | $2.10 \pm 1.01$         |
| P4     | $\mu E$ with xylene and cinnamon EO  | $52.79 \pm 20.25$  | $0.31 \pm 0.03$ | $1.40 \pm 0.77$         |
| P5     | Thyme essential oil                  | $98.28 \pm 37.24$  | $0.28 \pm 0.01$ | $0.51 \pm 0.15$         |
| P6     | Cinnamon essential oil               | $80.87 \pm 23.40$  | $0.26 \pm 0.02$ | $0.47 \pm 0.34$         |
